# Supplementary material for: Force Sensitivity in Saccharomyces cerevisiae Flocculins
Source: PubMed Central journal article supplement (PMC4989244; doi:10.1128/msphere.00128-16), 2016-08-17
Supplement: sph004162130sf1.pdf [file sph004162130sf1.pdf]

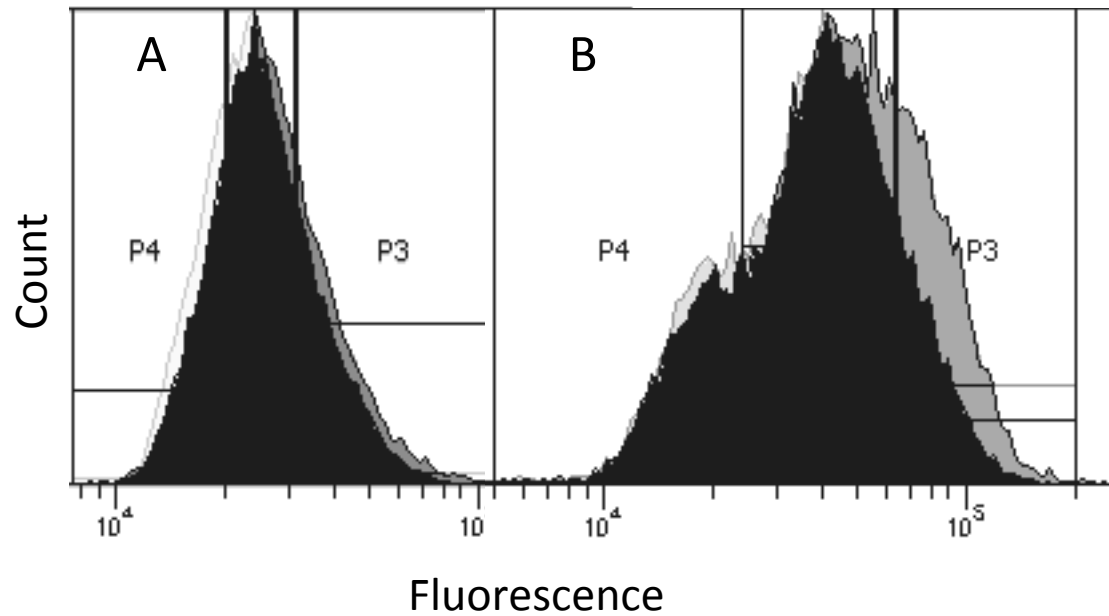

**Supplemental Fig. S1.** Overlays of ThS fluorescence of quiescent cell populations (black) or cells vortex-mixed for 5 min. (grey). A) Flo1-expressing cells; B) Flo11 expressing cells.
