# Supplementary material for: Force Sensitivity in Saccharomyces cerevisiae Flocculins
Source: PubMed Central journal article supplement (PMC4989244; doi:10.1128/msphere.00128-16), 2016-08-17
Supplement: sph004162130sf2.pdf [file sph004162130sf2.pdf]

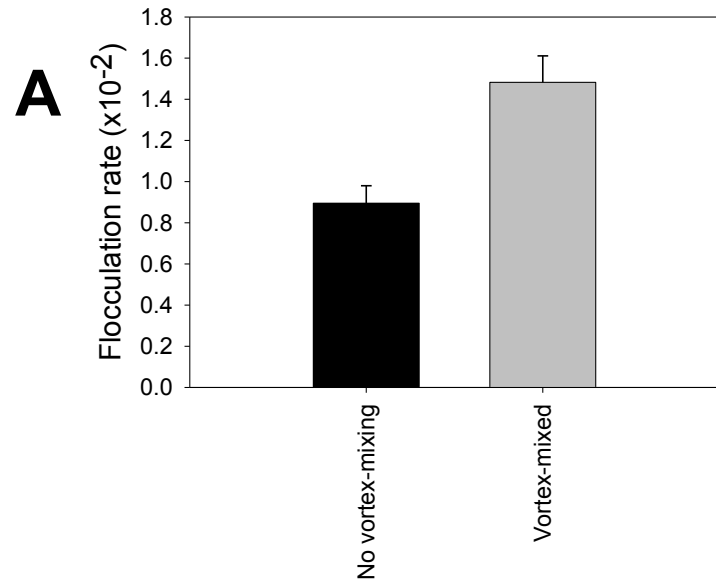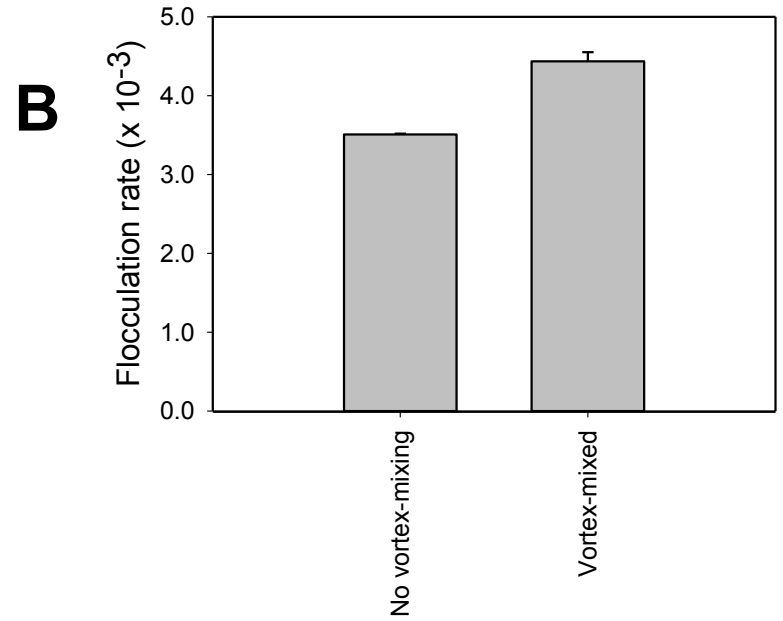

**Supplemental Fig. S2. Effects of vortex mixing on heat-killed flocculin-expressing cells.** (A) Effects of vortex-mixing on the flocculation rate of Flo11p-expressing cells after heat-killing. (B) Effects of vortex-mixing on the flocculation rate of Flo1p-expressing cells after heat-killing. Error bars represent standard deviation.
