# Supplementary material for: Force Sensitivity in Saccharomyces cerevisiae Flocculins
Source: PubMed Central journal article supplement (PMC4989244; doi:10.1128/msphere.00128-16), 2016-08-17
Supplement: sph004162130st3.pdf [file sph004162130st3.pdf]

**Supplemental Table S1:  $\beta$ -aggregation-positive sequences from *S. cerevisiae* adhesins**

| <b>Protein</b> | <b><math>\beta</math>-aggregation sequence</b> | <b><math>\beta</math>-aggregation (%)</b> | <b>Ile, Val, and Thr content (%)</b> |
|----------------|------------------------------------------------|-------------------------------------------|--------------------------------------|
| <b>Flo11p</b>  | VTTVVSTTVV                                     | 80                                        | 90                                   |
|                | ITTFV                                          | 53                                        | 83                                   |
|                | LVTTAVTTTVV                                    | 90                                        | 82                                   |
| <b>Flo1p</b>   | VYMYAGY                                        | 32                                        | 14                                   |
|                | TVIVI                                          | 89                                        | 100                                  |
|                | TIIVI (repeat 9 times)                         | 89                                        | 100                                  |
|                | TVIVI (repeat 6 times)                         | 89                                        | 100                                  |
|                | TVIVV                                          | 89                                        | 100                                  |
|                | TLVTVT                                         | 37                                        | 83                                   |
|                | AIVSTATVTV                                     | 48                                        | 70                                   |
|                | TVVTI                                          | 39                                        | 100                                  |
|                | TLVTVT                                         | 41                                        | 83                                   |
